# Supplementary material for: Genome Interpretation of Peruvian Inca Empire Descendants Reveals Actionable Insights
Source: Research Square preprint supplement (doi:10.21203/rs.3.rs-6362225/v1), 2025-08-05
Supplement: Supplementary file 1 [file 49ab3455e80feccb6b6e2924.xlsx]

## Sheet: severity ranking
Ranking used to select variants with different consequences
The most severe consequence was the one chosen for Variant Effect Predictor subsequent analysis
Consequence	Severity Ranking
transcript_ablation	1
splice_acceptor_variant	2
splice_donor_variant	3
stop_gained	4
frameshift_variant	5
stop_lost	6
start_lost	7
transcript_amplification	8
inframe_insertion	9
inframe_deletion	10
missense_variant	11
protein_altering_variant	12
splice_region_variant	13
incomplete_terminal_codon_variant	14
start_retained_variant	15
stop_retained_variant	16
synonymous_variant	17
coding_sequence_variant	18
regulatory_region_ablation	19
regulatory_region_amplification	20
TF_binding_site_ablation	21
TF_binding_site_amplification	22
regulatory_region_variant	23
TF_binding_site_variant	24
mature_miRNA_variant	25
5_prime_UTR_variant	26
3_prime_UTR_variant	27
non_coding_transcript_exon_variant	28
intron_variant	29
NMD_transcript_variant	30
non_coding_transcript_variant	31
upstream_gene_variant	32
downstream_gene_variant	33
TFBS_ablation	34
TFBS_amplification	35
TF_binding_site_variant	36
regulatory_region_ablation	37
regulatory_region_amplification	38
feature_elongation	39
regulatory_region_variant	40
feature_truncation	41
intergenic_variant	42
incomplete_terminal_codon_variant	43
start_retained_variant	44
stop_retained_variant	45
synonymous_variant	46
coding_sequence_variant	47
mature_miRNA_variant	48
5_prime_UTR_variant	49
3_prime_UTR_variant	50
non_coding_transcript_exon_variant	51
intron_variant	52
NMD_transcript_variant	53
non_coding_transcript_variant	54
upstream_gene_variant	55
downstream_gene_variant	56
TFBS_ablation	57
TFBS_amplification	58
TF_binding_site_variant	59
regulatory_region_ablation	60
regulatory_region_amplification	61
feature_elongation	62
regulatory_region_variant	63
feature_truncation	64
intergenic_variant	65
